# Supplementary material for: Amyotrophic Lateral Sclerosis Risk, Family Income, and Fish Consumption Estimates of Mercury and Omega-3 PUFAs in the United States
Source: MDPI journal article supplement (doi:10.3390/ijerph18094528), 2021-04-24
Supplement: s1 [file s1]

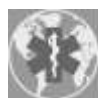

**Supplementary Table 1.** Mean mercury and omega-3 PUFA concentrations.

1

| Type             | Hg (ppm) | PUFA (ppm) |
|------------------|----------|------------|
| Ahi              | 0.27     | 27.9       |
| Anchovies        | 0.103    | 140        |
| Bass             | 0.288    | 80         |
| Black_crappie    | 0.029    | 11.1       |
| Bluegill         | 0.09     | 9.4        |
| Calamari         | 0.044    | 40         |
| Canned_tuna      | 0.179    | 44         |
| Catfish          | 0.118    | 40         |
| Clams            | 0.028    | 10         |
| Clams_softshell  | 0.016    | 10         |
| Cod              | 0.087    | 30         |
| Crab             | 0.098    | 40         |
| Crab_cakes       | 0.098    | 40         |
| Crappie          | 0.052    | 11         |
| Fish             | 0.083    | 68         |
| Fish_cakes       | 0.02     | 40         |
| Flounder         | 0.119    | 20         |
| Grouper          | 0.417    | 20         |
| Haddock          | 0.164    | 20         |
| Halibut          | 0.254    | 70         |
| Herring          | 0.043    | 182.5      |
| Lobster          | 0.153    | 40         |
| Mackerel         | 0.586    |            |
| Mahi_mahi        | 0.178    | 13.9       |
| Mussels          | 0.028    | 78.2       |
| Octopus          | 0.1      | 18.3       |
| Oysters          | 0.02     | 68.8       |
| Perah            | 0.083    | 68         |
| Perch            | 0.133    | 20         |
| Pollock          | 0.058    | 50         |
| Salmon           | 0.048    | 190        |
| Sardines         | 0.079    | 140        |
| Saugen           | 0.083    | 68         |
| Scallops         | 0.04     | 36.4       |
| Sea_bass         | 0.12     | 80         |
| Shrimp           | 0.053    | 50         |
| Smelt            | 0.08     | 100        |
| Snapper          | 0.23     | 20         |
| Squid            | 0.044    | 40         |
| Striped_sea_bass | 0.285    | 80         |
| Steelhead        | 0.187    | 60         |
| Sushi            | 0.249    | 170.2      |
| Swordfish        | 0.893    | 20         |
| Swai             | 0.018    | 44         |
| Tilapia          | 0.019    | 13.5       |
| Trout            | 0.187    | 93.2       |
| Tuna             | 0.45     | 150.4      |
| Walleye          | 0.404    | 39.7       |
| Whitefish        | 0.09     | 180        |

2

**Supplementary Table 2.** Seafood mercury and omega-3 PUFA mean concentration calculations for broad or vague participant responses.

| Participant response         | Mercury and omega-3 PUFA mean concentration calculation                                                                                                    |
|------------------------------|------------------------------------------------------------------------------------------------------------------------------------------------------------|
| "Canned tuna"                | Average concentrations for albacore and light canned tuna weighted by their relative frequencies of consumption in the United States                       |
| "Crappie"                    | Average concentrations for black and white crappie weighted by relative frequencies of consumption in the United States                                    |
| "Fish", "Perch", or "Saugen" | Average concentrations for the ten most consumed seafoods in the United States, weighted by their relative frequencies of consumption in the United States |
| "Fish cakes"                 | Concentration for "breaded fish sticks and patties" (mercury) or "fish sticks" (omega-3 PUFA)                                                              |
| "Perch"                      | Average concentrations for ocean and freshwater perch, weighted by their relative frequencies of consumption in the United States                          |
| "Steelhead"                  | Used mean omega-3 PUFA concentration for trout, which was closest available                                                                                |
| "Sushi"                      | Average concentrations for tuna and salmon, the two most common seafood species found in sushi                                                             |

Abbreviations: omega-3 PUFA = omega-3 polyunsaturated fatty acids.
